# Supplementary material for: Properties of Disorder-Engineered Black Titanium Dioxide Nanoparticles through Hydrogenation
Source: PubMed Central journal article supplement — Sci Rep. 2013 Mar 26;3:1510. doi: 10.1038/srep01510 (PMC3607837; doi:10.1038/srep01510), 2013-03-26
Supplement: srep01510-s1.pdf [file srep01510-s1.pdf]

## Supplementary information

---

### Properties of Disorder-Engineered Black Titanium Dioxide Nanoparticles through Hydrogenation

Xiaobo Chen,<sup>1,\*</sup> Lei Liu,<sup>2</sup> Zhi Liu,<sup>3</sup> Matthew A. Marcus,<sup>3</sup> Wei-Cheng Wang,<sup>3,4</sup> Nathan A. Oyler,<sup>1</sup> Michael E. Grass,<sup>3</sup> Baohua Mao,<sup>3,5</sup> Per-Anders Glans,<sup>3</sup> Peter Y. Yu,<sup>6</sup> Jinghua Guo,<sup>3</sup> Samuel S. Mao<sup>7,8,\*</sup>

<sup>1</sup>University of Missouri - Kansas City, Department of Chemistry, Kansas City, MO 64110, USA.

<sup>2</sup>State Key Laboratory of Luminescence and Applications, Changchun Institute of Optics, Fine Mechanics and Physics, Chinese Academy of Sciences, 3888 Dongnanhu Road, Changchun, 130033, People's Republic of China. <sup>3</sup>Advanced Light Source, Lawrence Berkeley National Laboratory, Berkeley, CA 94720, USA. <sup>4</sup>Department of Physics, Tamkang University, Tamsui, Taiwan 250, R.O.C. <sup>5</sup>Institute of Functional Nano & Soft Materials Laboratory, Soochow University, Suzhou, Jiangsu 215123, China. <sup>6</sup>Department of Physics, University of California at Berkeley, Berkeley, CA 94720, USA. <sup>7</sup>Department of Mechanical Engineering, University of California at Berkeley, Berkeley, CA 94720, USA. <sup>8</sup>Environmental Energy Technology Division, Lawrence Berkeley National Laboratory, Berkeley, CA 94720, USA.

Correspondence and requests for materials should be addressed to X. C. (chenxiaobo@umkc.edu) or S. S. Mao (ssmao@me.berkeley.edu).

Supplementary Information contains:

Supplementary Figures S1-S4

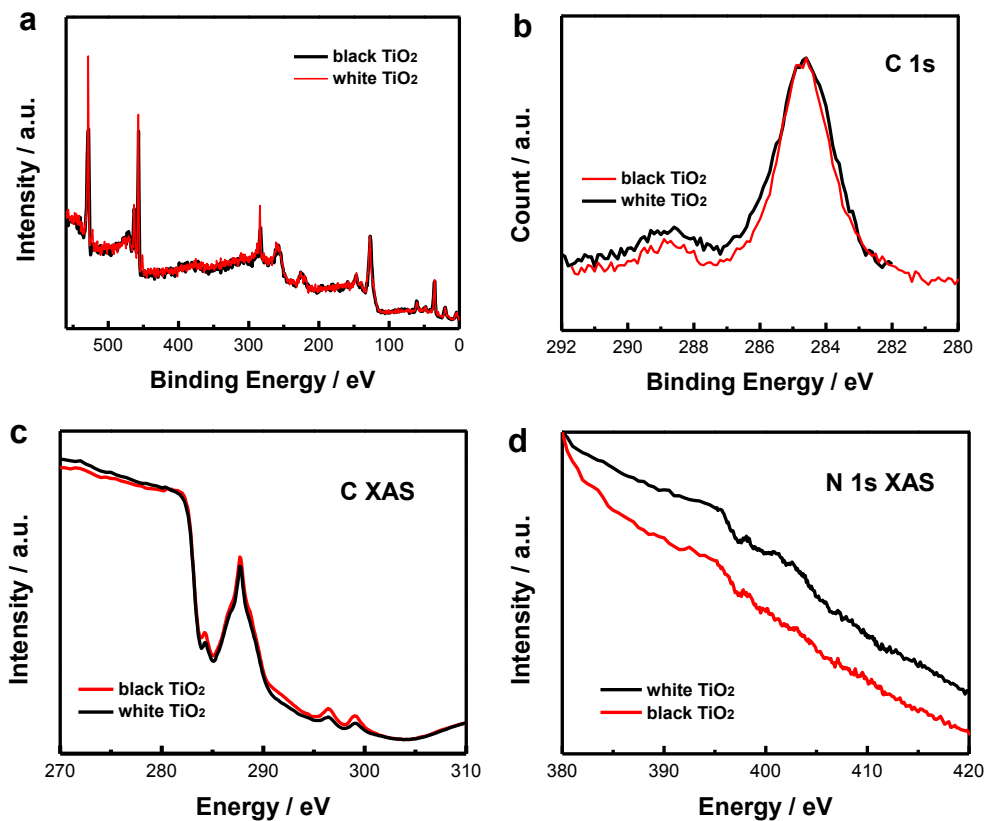

**Supplementary Figure S1. XPS spectra of bare white and hydrogenated black TiO<sub>2</sub> nanocrystals. a**, Survey XPS spectra. **b**, C 1s XPS spectra. Synchrotron XAS profiles of bare white and hydrogenated black TiO<sub>2</sub> nanocrystals (note that the intensity of dips originating from contaminated optics is only a few percent of total intensity). **c**, C K-edge XAS profiles, and **d**, N K-edge XAS profiles.

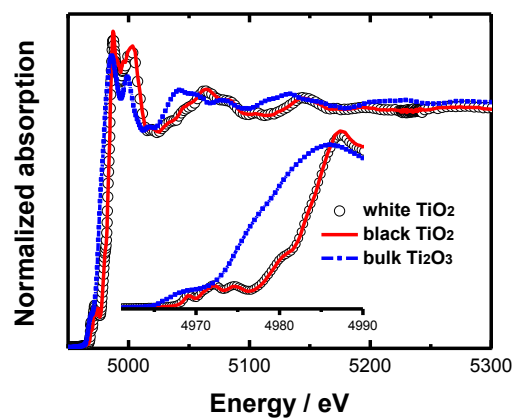

Supplementary Figure S2. XANES comparison between hydrogenated black and bare white TiO<sub>2</sub> along with the Ti<sup>3+</sup> reference: Ti<sub>2</sub>O<sub>3</sub>.

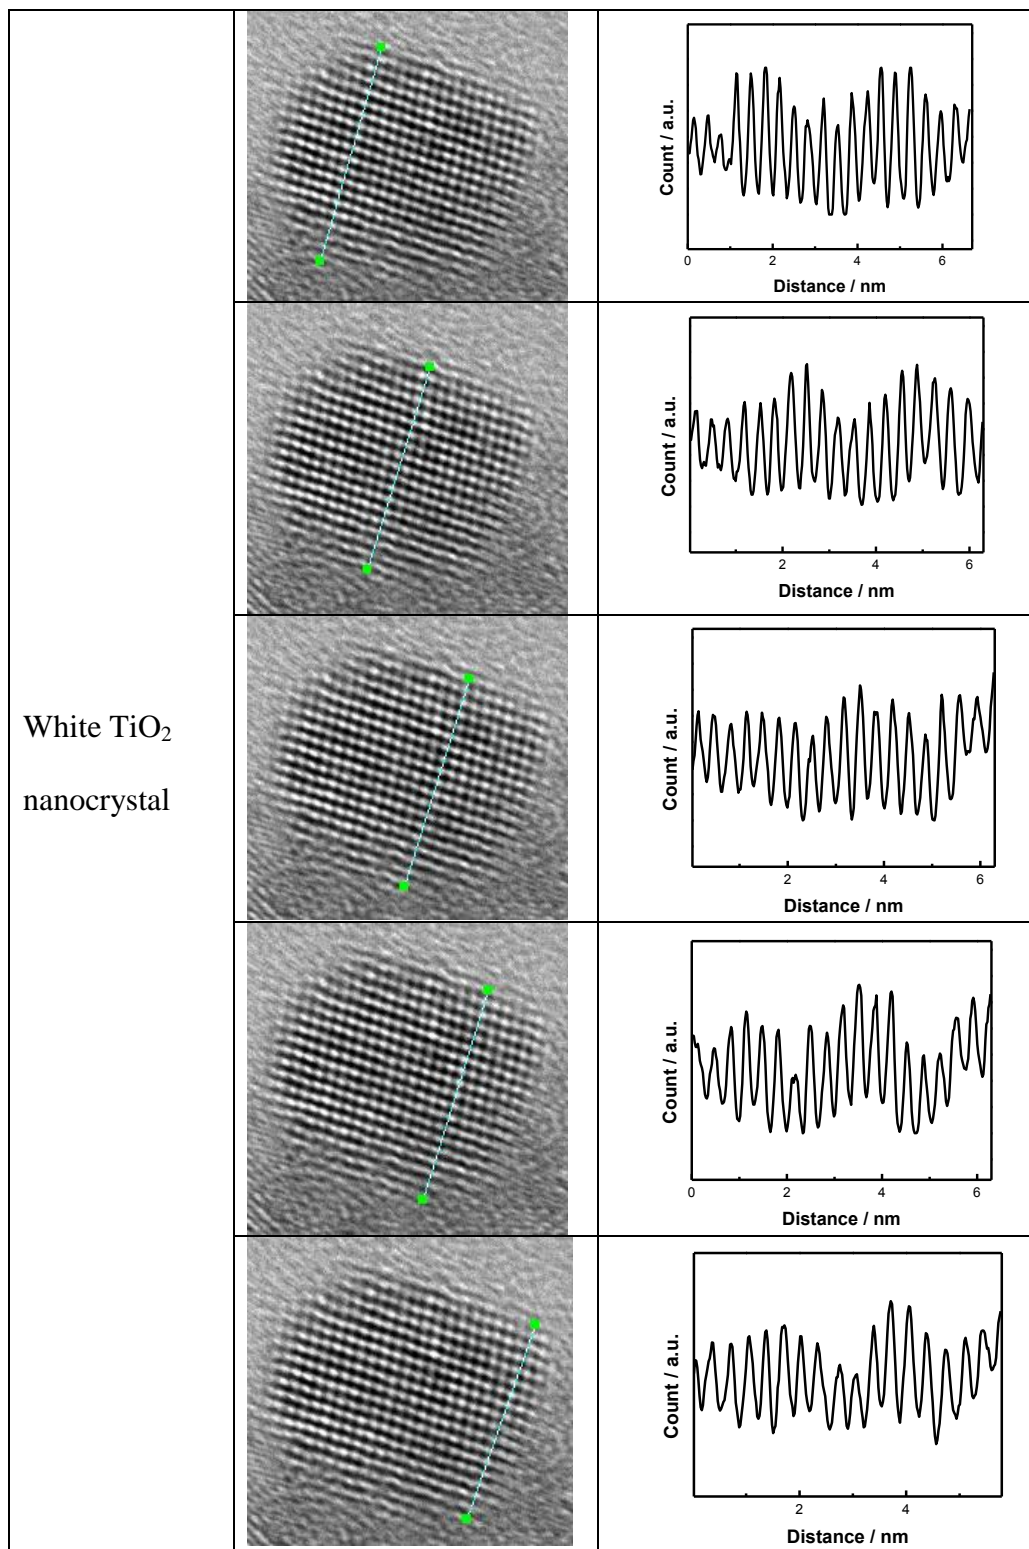

**Supplementary Figure S3. Lattice structural analysis of HRTEM images of white TiO<sub>2</sub> nanocrystals.** The horizontal axes in the right panel from 0 to 6 nm correspond to the left and right ends of the lines in the left panel.

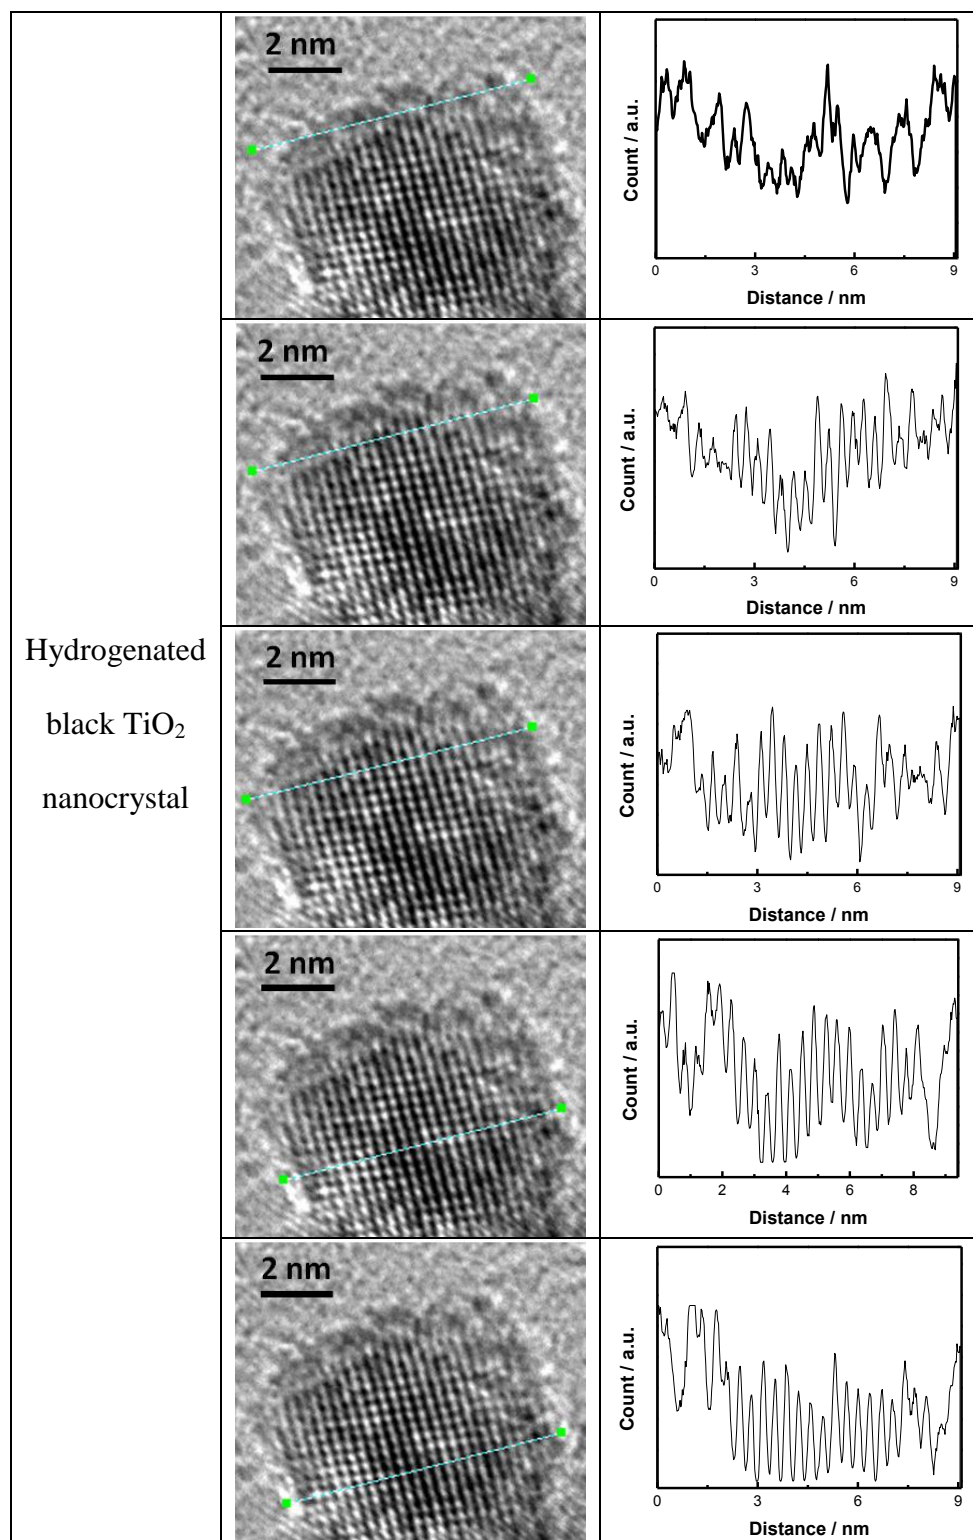

**Supplementary Figure S4. Lattice structural analysis of HRTEM images of black TiO<sub>2</sub> nanocrystals.** The horizontal axes in the right panel from 0 to 9 nm correspond to the left and right ends of the lines in the left panel.
